# Supplementary material
Source: Springer Nature journal article supplement (https://www.springermedizin.de/resource/supplementary/12974_2011_463_MOESM1_ESM.pdf/9601334)

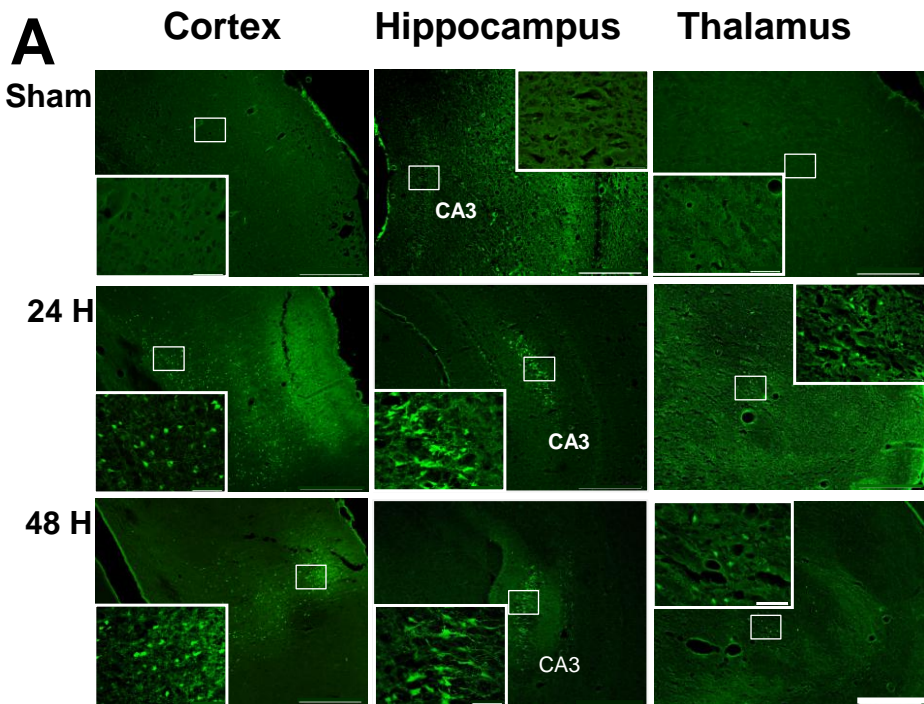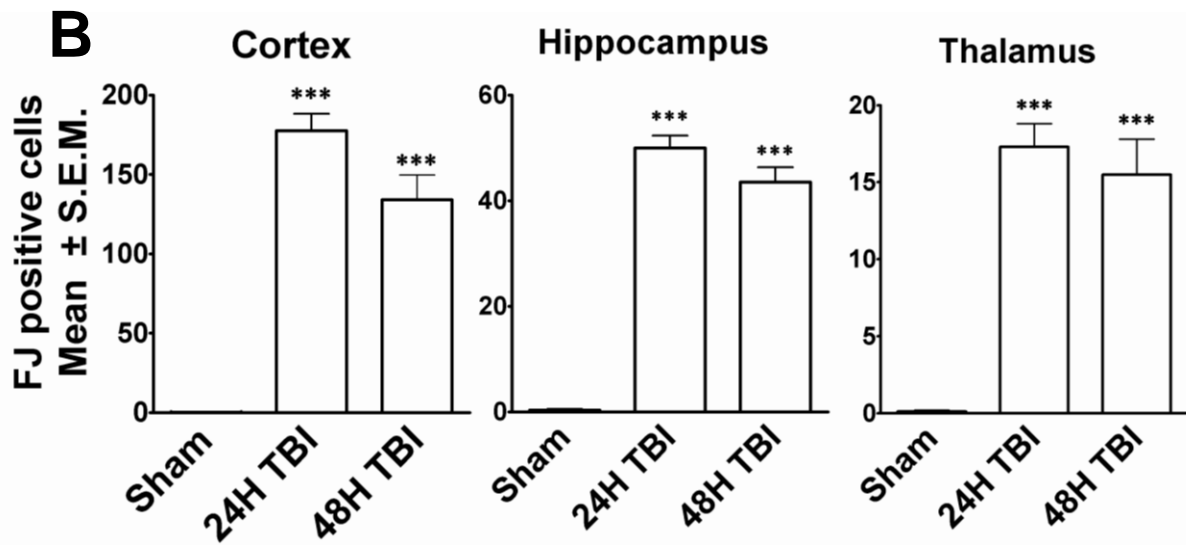

Supplement: MOESM1 [file 9601334]
